# Supplementary material for: Hydrogen-bond networks in the binary complexes of trigonal molecules with 4,4′-bipyridine
Source: Royal Society of Chemistry journal article supplement (doi:10.1039/b915005f), 2010-01-01
Supplement: b915005f.pdf [file b915005f.pdf]

## Hydrogen-bond networks in the binary complexes of trigonal molecules with 4,4'-bipyridine

Binoy K Saha\* and Suman Bhattacharya

### Supplementary Information

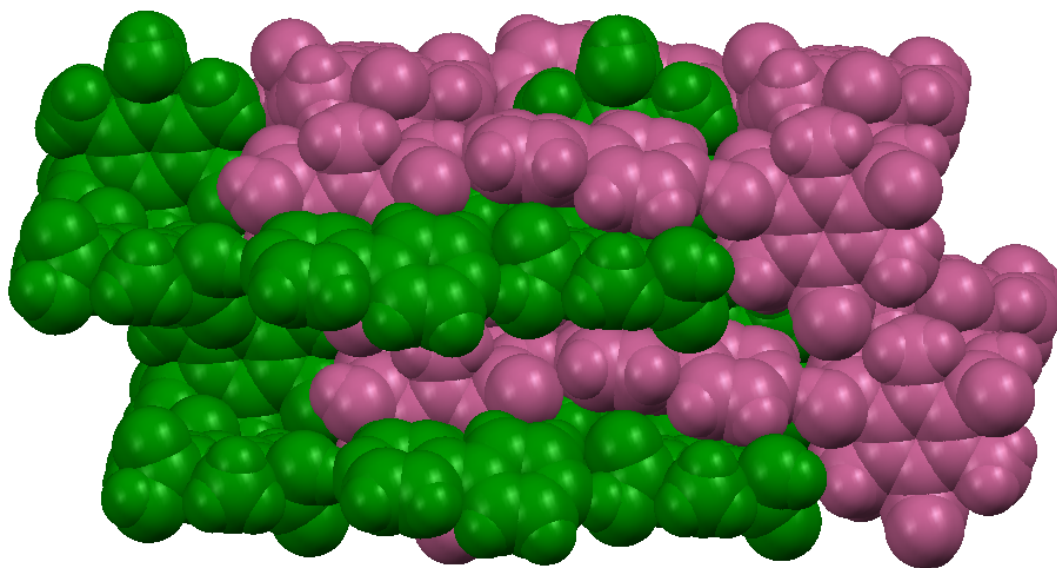

(a)

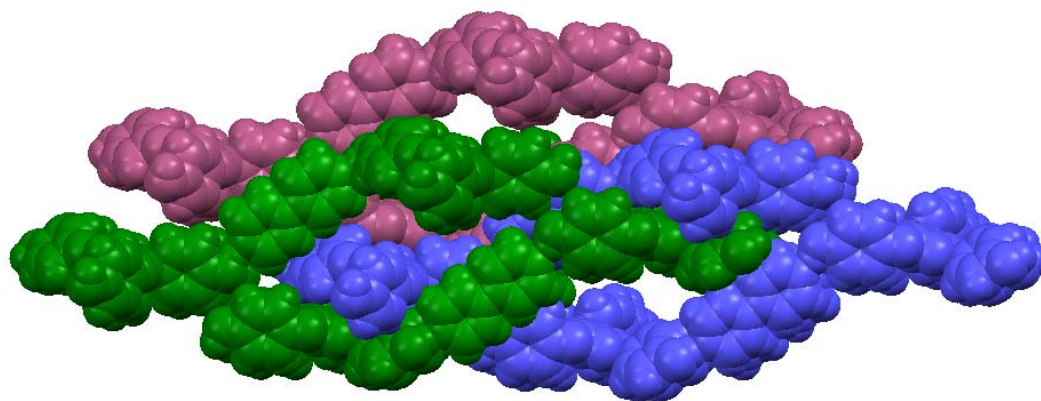

(b)

Figure S1 Space fill models of the interpenetrated networks in the crystal structures of (a) **MTAH<sub>3</sub>•bipy** and (b) **HPT•bipy**.

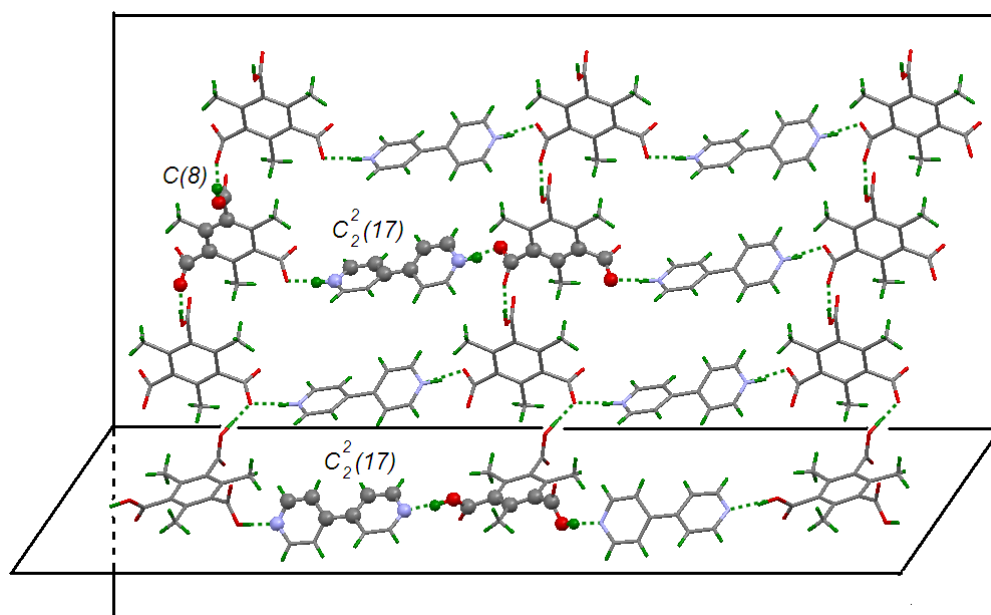

Figure S2 Graphset analysis of the hydrogen bond networks in the crystal structures of **MTAH<sub>3</sub>•bipy**. The C(8) chains of MTAH<sup>2-</sup> anions formed through O–H···O<sup>-</sup> interactions, C<sub>2</sub><sup>2</sup>(17) chain consisting of alternate bipyH<sub>2</sub><sup>2+</sup> cations and MTAH<sup>2-</sup> anions and C<sub>2</sub><sup>2</sup>(17) chain of neutral MTAH<sub>3</sub> and bipy molecules

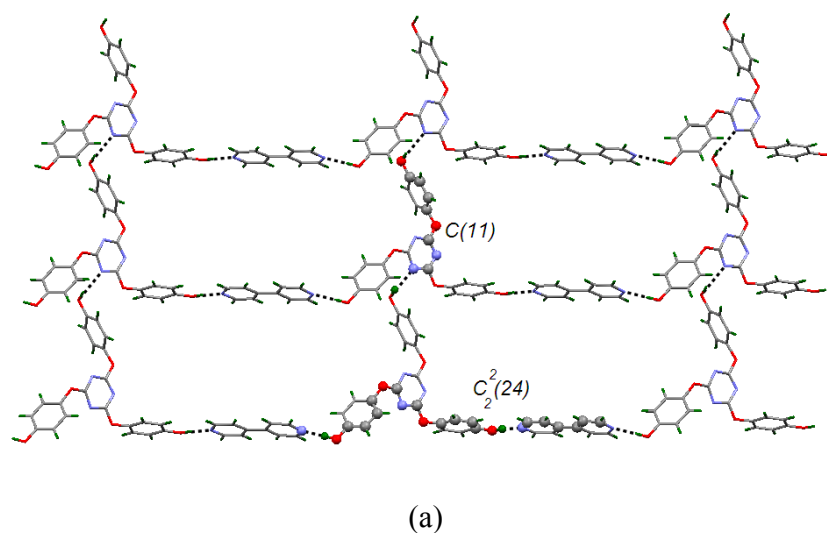

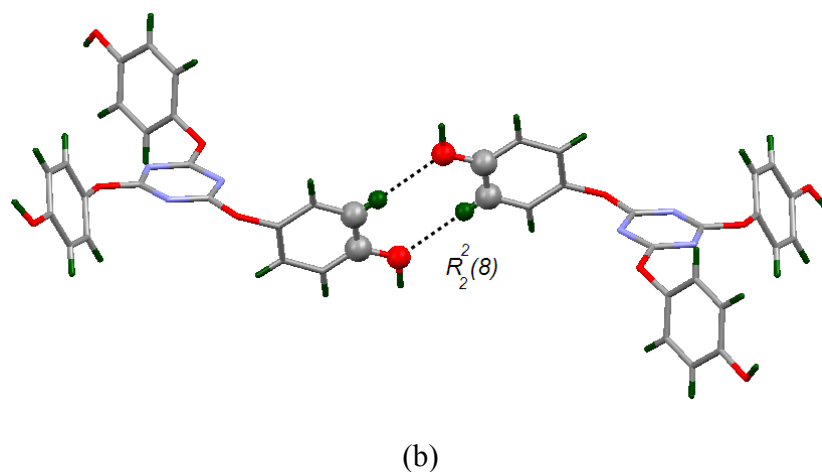

Figure S3 Graphset analysis of the hydrogen bond networks in the crystal structures of **HPT•bipy**. (a) Parallel chains of triazine molecules, through O–H···N interactions forming the  $C(11)$  chain and the adjacent triazine moieties of the  $C(11)$  chains interconnected by bipy linkers through O–H···N interactions forming the  $C_2^2(24)$  chain. (b) The  $R_2^2(8)$  centrosymmetric dimer like linkage through C–H···O interactions leading to the **pcu** net.

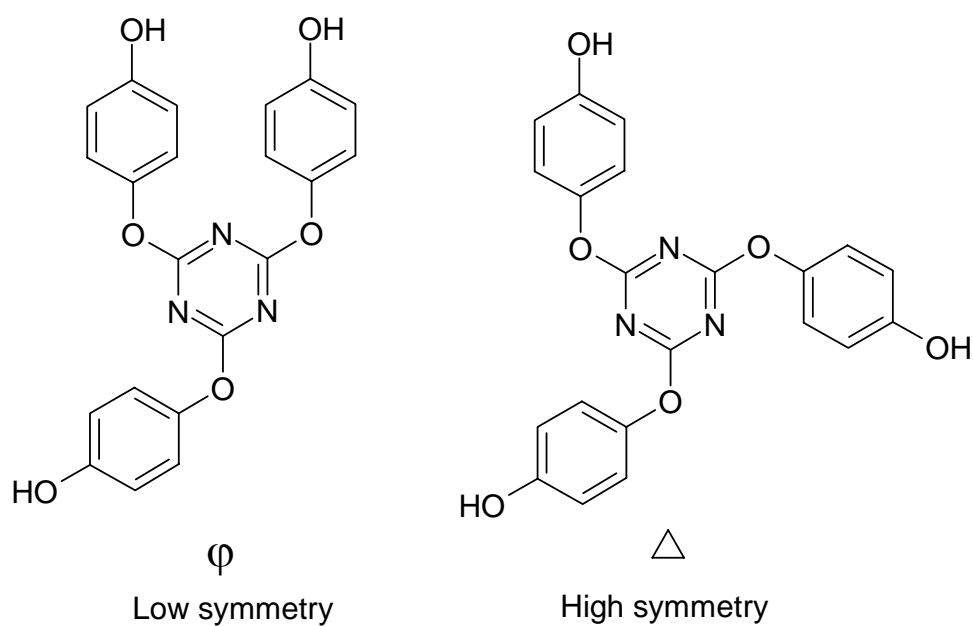

Figure S4 Two possible conformations of HPT – low symmetry ( $\phi$ ) and high symmetry ( $\Delta$ ).
